# Supplementary material
Source: publisher figshare collection journal article supplement (https://gsajournals.figshare.com/ndownloader/files/27643620)
Supplement: Supplementary file 1 [file 27643620]

## Sheet: TTKSK LIT t-test (LSD)
Supplementary file 2. Least significant difference (LSD) tests for the linearized infection type (LIT) scores observed on ND495 × Largo recombinant inbred lines and their parental lines tested with race TTKSK of Puccinia graminis f. sp. tritici.
Line	No of replicates	TTKSK LIT Mean	TTKSK LIT Std Dev
NL025	2	4.5	0.707107
Largo	2	5	0
NL001	2	5	0
NL002	2	5	0
NL003	2	5	0
NL006	2	5	0
NL007	2	5	0
NL008	2	5	0
NL013	2	5	0
NL022	2	5	0
NL023	2	5	0
NL024	2	5	0
NL028	2	5	0
NL029	2	5	0
NL032	2	5	0
NL034	2	5	0
NL035	2	5	0
NL041	2	5	0
NL043	2	5	0
NL044	2	5	0
NL046	2	5	0
NL049	2	5	0
NL051	2	5	0
NL052	2	5	0
NL053	2	5	0
NL057	2	5	0
NL059	2	5	0
NL061	2	5	0
NL063	2	5	0
NL065	2	5	0
NL066	2	5	0
NL069	2	5	0
NL073	2	5	0
NL081	2	5	0
NL085	2	5	0
NL086	2	5	0
NL087	2	5	0
NL088	2	5	0
NL089	2	5	0
NL095	2	5	0
NL097	2	5	0
NL102	2	5	0
NL103	2	5	0
NL106	2	5	0
NL109	2	5	0
NL115	2	5	0
NL117	2	5	0
NL120	2	5	0
NL123	2	5	0
NL124	2	5	0
NL125	2	5	0
NL132	2	5	0
NL133	2	5	0
NL135	2	5	0
NL140	2	5	0
NL141	2	5	0
NL142	2	5	0
NL143	2	5	0
NL144	2	5	0
NL145	2	5	0
NL147	2	5	0
NL149	2	5	0
NL152	2	5	0
NL153	2	5	0
NL157	2	5	0
NL158	2	5	0
NL159	2	5	0
NL161	2	5	0
NL163	2	5	0
NL164	2	5	0
NL167	2	5	0
NL169	2	5	0
NL170	2	5	0
NL171	2	5	0
NL172	2	5	0
NL180	2	5	0
NL181	2	5	0
NL186	2	5	0
NL189	2	5	0
NL192	2	5	0
NL193	2	5	0
NL197	2	5	0
NL199	2	5	0
NL200	2	5	0
NL204	2	5	0
NL207	2	5	0
NL209	2	5	0
NL210	2	5	0
NL212	2	5	0
NL213	2	5	0
NL214	2	5	0
NL216	2	5	0
NL219	2	5	0
NL224	2	5	0
NL225	2	5	0
NL232	2	5	0
NL233	2	5	0
NL235	2	5	0
NL009	2	5.5	0.707107
NL027	2	5.5	0.707107
NL050	2	5.5	0.707107
NL077	2	5.5	0.707107
NL091	2	5.5	0.707107
NL113	2	5.5	0.707107
NL118	2	5.5	0.707107
NL136	2	5.5	0.707107
NL168	2	5.5	0.707107
NL173	2	5.5	0.707107
NL182	2	5.5	0.707107
NL195	2	5.5	0.707107
NL215	2	5.5	0.707107
NL217	2	5.5	0.707107
NL048	2	6	1.41421
NL060	2	6	1.41421
NL074	2	6	1.41421
NL084	2	6	0
NL090	2	6	1.41421
NL111	2	6	0
NL121	2	6	0
NL130	2	6	1.41421
NL151	2	6	1.41421
NL154	2	6	1.41421
NL162	2	6	0
NL177	2	6	1.41421
NL178	2	6	0
NL179	2	6	1.41421
NL190	2	6	1.41421
NL206	2	6	1.41421
NL229	2	6	1.41421
NL011	2	6.5	0.707107
NL015	2	6.5	0.707107
NL026	2	6.5	0.707107
NL038	2	6.5	0.707107
NL047	2	6.5	2.12132
NL093	2	6.5	0.707107
NL107	2	6.5	0.707107
NL110	2	6.5	0.707107
NL134	2	6.5	0.707107
NL156	2	6.5	0.707107
NL203	2	6.5	0.707107
NL220	2	6.5	0.707107
NL228	2	6.5	0.707107
NL010	2	7	0
NL019	2	7	0
NL031	2	7	0
NL033	2	7	0
NL094	2	7	1.41421
NL096	2	7	1.41421
NL101	2	7	0
NL105	2	7	0
NL116	2	7	0
NL128	2	7	0
NL148	2	7	0
NL150	1	7	.
NL155	2	7	0
NL176	2	7	0
NL202	2	7	0
NL218	2	7	1.41421
NL014	2	7.5	0.707107
NL036	2	7.5	0.707107
NL037	2	7.5	0.707107
NL075	2	7.5	0.707107
NL083	2	7.5	0.707107
NL119	2	7.5	0.707107
NL126	2	7.5	0.707107
NL175	2	7.5	0.707107
NL223	2	7.5	0.707107
NL230	2	7.5	0.707107
NL056	2	8	0
NL191	2	8	0
NL017	2	8.5	0.707107
NL067	2	8.5	0.707107
NL068	2	8.5	0.707107
NL076	2	8.5	0.707107
NL092	2	8.5	0.707107
NL098	2	8.5	0.707107
NL112	2	8.5	0.707107
NL129	2	8.5	0.707107
NL138	2	8.5	0.707107
NL160	2	8.5	0.707107
NL166	2	8.5	0.707107
NL174	2	8.5	0.707107
NL183	2	8.5	0.707107
NL226	2	8.5	0.707107
ND495	2	9	0
NL005	2	9	0
NL016	2	9	0
NL018	2	9	0
NL020	2	9	0
NL021	2	9	0
NL030	2	9	0
NL040	2	9	0
NL042	2	9	0
NL045	2	9	0
NL055	2	9	0
NL058	2	9	0
NL062	2	9	0
NL064	2	9	0
NL070	2	9	0
NL071	2	9	0
NL072	2	9	0
NL078	2	9	0
NL080	2	9	0
NL082	2	9	0
NL099	2	9	0
NL100	2	9	0
NL104	2	9	0
NL108	2	9	0
NL114	2	9	0
NL122	2	9	0
NL127	2	9	0
NL137	2	9	0
NL139	2	9	0
NL146	2	9	0
NL165	2	9	0
NL184	2	9	0
NL185	2	9	0
NL187	2	9	0
NL188	2	9	0
NL194	2	9	0
NL196	2	9	0
NL201	2	9	0
NL205	2	9	0
NL208	2	9	0
NL221	2	9	0
NL222	2	9	0
NL234	2	9	0
Critical t		1.97056
LSD (α = 0.05)		1.0186
